# Supplementary material
Source: publisher figshare collection journal article supplement (https://acs.figshare.com/ndownloader/files/17371331)
Supplement: Supplementary file 1 [file 17371331]

Archive with 9 entries (9 files):
- info.xml
- cs9b02165_high_quality.mp4
- cs9b02165.pdf
- PermissionfromPhotographerFormJZZ.pdf
- PermissionfromPhotographerFormRBG.pdf
- PersoninPhotoAN.pdf
- PersoninPhotoJZZ.pdf
- PersoninPhotoRBG.pdf
- PhotographerAHS.pdf
