# Supplementary material
Source: publisher figshare collection journal article supplement (https://acs.figshare.com/ndownloader/files/17371331)
Supplement: Supplementary file 1 [file 17371331 › info.xml]

<presentation>
	<article>
		<title>Machine Learning Accelerates the Discovery of Design Rules and Exceptions in Stable Metal-Oxo Intermediate Formation</title>
		<doi>10.1021/acscatal.9b02165</doi>
		<copyright>American Chemical Society</copyright>
		<narrator>Aditya Nandy</narrator>
		<contact>Aditya Nandy</contact>
		<contact-email>nandy@mit.edu</contact-email>
		<author-list>
			<author>Rachel B. Getman, Heather J. Kulik</author>
		</author-list>
	</article>
	<slides height-width-ratio=".75">
		<slide audio-time="22">
			<subtitle/>
		</slide>
		<slide audio-time="122">
			<subtitle/>
		</slide>
		<slide audio-time="165">
			<subtitle/>
		</slide>
		<slide audio-time="122">
			<subtitle/>
		</slide>
		<slide audio-time="77">
			<subtitle/>
		</slide>
		<slide audio-time="32">
			<subtitle/>
		</slide>
	</slides>
	<audio duration="540"/>
</presentation>
