# Supplementary material
Source: publisher figshare collection journal article supplement (https://acs.figshare.com/ndownloader/files/17371331)
Supplement: Supplementary file 1 [file 17371331 › PermissionfromPhotographerFormRBG.pdf]

# Permission Request Form for Use of *Individual and/or Group Photos* in *ACS LiveSlides* from Copyright Owners/Publishers/Photographers Other Than ACS

Date: \_\_\_\_\_

**To:** \_\_\_\_\_  
Prof. Rachel B. Getman  
Publisher's/Copyright Owner's Contact Information  
\_\_\_\_\_  
\_\_\_\_\_  
\_\_\_\_\_  
rgetman@g.clemson.edu  
Publisher's/Copyright Owner's Email Address

**From:** \_\_\_\_\_  
Your Name and Complete Mailing Address  
Kulik Group, 77 Massachusetts Avenue, 66-265  
\_\_\_\_\_  
\_\_\_\_\_  
6502816094  
Your Phone Number Including Country and City Codes  
nandy@mit.edu  
Your Email Address  
\_\_\_\_\_  
**Your Specific Deadline Date**

I am preparing an *ACS LiveSlides* entitled:

Machine Learning Accelerates the Discovery of Design Rules and Exceptions in Stable Metal-Oxo Intermediate Formation

to appear with

Machine Learning Accelerates the Discovery of Design Rules and Exceptions in Stable Metal-Oxo Intermediate Formation

Title of ACS Publication and DOI

which is published by the American Chemical Society, a not-for-profit membership society and a STM signatory.

I would appreciate your permission to use the following material in all formats including but not limited to print, microform, electronic, and/or CD-ROM from the following reference:

## Individual Photographs of the Following Individuals:

Prof. Rachel Getman  
\_\_\_\_\_  
\_\_\_\_\_  
\_\_\_\_\_

## Collective Photograph (s) representing the following groups:

\_\_\_\_\_  
\_\_\_\_\_  
\_\_\_\_\_

If you, the photographer, have a required **credit line**, please include it below:

\_\_\_\_\_  
\_\_\_\_\_

For your convenience, you may sign and date the bottom of this letter to indicate your agreement. Please return this form to me at the above email address, by the above **deadline date** (if given above). Thank you.

**Agreed:**

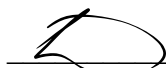

Publisher's/Copyright Owner's Signature or Stamp

**Date:**

8/16/19

Date

**SIGN HERE**

Submit completed and signed form with your signed *ACS LiveSlides* Video Release.

7/25/16
