# Supplementary material
Source: publisher figshare collection journal article supplement (https://acs.figshare.com/ndownloader/files/17371331)
Supplement: Supplementary file 1 [file 17371331 › PhotographerAHS.pdf]

# Permission Request Form for Use of *Individual and/or Group Photos* in *ACS LiveSlides* from Copyright Owners/Publishers/Photographers Other Than ACS

Date: 08/12/19

To: Mr. Adam Steeves  
Publisher's/Copyright Owner's Contact Information  
  
asteeves@gmail.com  
Publisher's/Copyright Owner's Email Address

From: Aditya Nandy  
Your Name and Complete Mailing Address  
Kulik Group @ MIT  
77 Massachusetts Ave.  
Building 66-265  
  
Your Phone Number Including Country and City Codes  
650-281-6094  
Your Email Address  
nandy@mit.edu  
Your Specific Deadline Date

I am preparing an *ACS LiveSlides* entitled:

Machine Learning Accelerates the Discovery of Design Rules and Exceptions in Stable Metal–Oxo Intermediate Formation

to appear with

Machine Learning Accelerates the Discovery of Design Rules and Exceptions in Stable Metal–Oxo Intermediate Formation; doi: 10.1021/acscatal.9b02165  
Title of ACS Publication and DOI

which is published by the American Chemical Society, a not-for-profit membership society and a STM signatory.

I would appreciate your permission to use the following material in all formats including but not limited to print, microform, electronic, and/or CD-ROM from the following reference:

**Individual Photographs of the Following Individuals:**

\_\_\_\_\_  
\_\_\_\_\_  
\_\_\_\_\_

**Collective Photograph (s) representing the following groups:**

Kulik group at MIT  
\_\_\_\_\_  
\_\_\_\_\_

If you, the photographer, have a required **credit line**, please include it below:

N/A  
\_\_\_\_\_

For your convenience, you may sign and date the bottom of this letter to indicate your agreement. Please return this form to me at the above email address, by the above **deadline date** (if given above). Thank you.

Agreed: 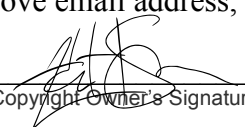  
Publisher's/Copyright Owner's Signature or Stamp

Date: 08/12/19  
Date

**SIGN HERE**

Submit completed and signed form with your signed *ACS LiveSlides* Video Release. 7/25/16
